# Supplementary material
Source: PubMed Central journal article supplement (PMC3752804)
Supplement: SD3.pdf [file SD3.pdf]

**3. CLINICAL HISTORY**

3000. Are you feeling well today?

Yes.....1 (Go to Q.3001)   
 No.....2

3000a. What illnesses (including fever) do you currently have?

3001. Have you had fever in the past 3 months?

Yes.....1  
 No.....2  
 Don't know / Not sure.....888 } (Go to Q.3004)

3002. Have you had fever in the past specified period?

| No. | Had fever in the following past period from this interviewed date? | Febrile or not?<br>1. Yes<br>2. No<br>3. Don't know / Not sure | Record temperature (°C) at onset of fever (if febrile) |
|-----|--------------------------------------------------------------------|----------------------------------------------------------------|--------------------------------------------------------|
| 1   | Past 1 week                                                        |                                                                |                                                        |
| 2   | Between past 1 week to past 1 month                                |                                                                |                                                        |
| 3   | Between past 1 to 2 months                                         |                                                                |                                                        |
| 4   | Between past 2 to 3 months                                         |                                                                |                                                        |

3003. In the past 3 months, specify the (approximate) onset date and duration of symptoms for fever and other symptoms you had at the time of fever.

| No.                                                                                                  | Symptom             | Most recent fever      |                                | 2 <sup>nd</sup> recent fever |                                | 3 <sup>rd</sup> recent fever |                                |
|------------------------------------------------------------------------------------------------------|---------------------|------------------------|--------------------------------|------------------------------|--------------------------------|------------------------------|--------------------------------|
|                                                                                                      |                     | Most recent onset date | Duration of symptoms (in days) | Most recent onset date       | Duration of symptoms (in days) | Most recent onset date       | Duration of symptoms (in days) |
| <b>A</b>                                                                                             | <b>Fever</b>        |                        |                                |                              |                                |                              |                                |
| If you had fever, specify <i>other</i> symptoms you had for the same episode. If not, skip to Q3004. |                     |                        |                                |                              |                                |                              |                                |
| 1                                                                                                    | Chills              |                        |                                |                              |                                |                              |                                |
| 2                                                                                                    | Intense headache    |                        |                                |                              |                                |                              |                                |
| 3                                                                                                    | Body (muscle) aches |                        |                                |                              |                                |                              |                                |
| 4                                                                                                    | Bone ache or joint  |                        |                                |                              |                                |                              |                                |

Excerpt from questionnaire

|     |                                                 |  |  |  |  |  |  |
|-----|-------------------------------------------------|--|--|--|--|--|--|
|     | pains                                           |  |  |  |  |  |  |
| 5   | Loss of appetite                                |  |  |  |  |  |  |
| 6   | Taste alterations                               |  |  |  |  |  |  |
| 7   | Nausea                                          |  |  |  |  |  |  |
| 8   | Vomiting                                        |  |  |  |  |  |  |
| 9   | Development of skin rashes                      |  |  |  |  |  |  |
| 10  | Skin sensitivity                                |  |  |  |  |  |  |
| 11  | Bleeding from the nose, mouth and gums          |  |  |  |  |  |  |
| 12  | Black stools, similar in appearance to coal tar |  |  |  |  |  |  |
| 13  | Diarrhoea                                       |  |  |  |  |  |  |
| 14  | Severe and continuous pain in the abdomen       |  |  |  |  |  |  |
| 15  | Restlessness                                    |  |  |  |  |  |  |
| 16  | General weakness                                |  |  |  |  |  |  |
| 17  | Drowsiness                                      |  |  |  |  |  |  |
| 18  | Pain behind the eye(s)                          |  |  |  |  |  |  |
| 19  | Red eye(s)                                      |  |  |  |  |  |  |
| 20  | Cough                                           |  |  |  |  |  |  |
| 21  | Sore throat                                     |  |  |  |  |  |  |
| 22  | Runny nose                                      |  |  |  |  |  |  |
| 23  | Others 1 (specify):<br>_____                    |  |  |  |  |  |  |
| 24  | Others 2 (specify):<br>_____                    |  |  |  |  |  |  |
| 25  | Others 3 (specify):<br>_____                    |  |  |  |  |  |  |
| 26  | Others 4 (specify):<br>_____                    |  |  |  |  |  |  |
| 888 | Don't know                                      |  |  |  |  |  |  |

3004. Have you ever been told by a doctor that you had dengue fever?

Yes.....1

If yes, specify:

- Most recent onset date (approximate): \_\_\_\_\_
- Name of doctor who diagnosed: \_\_\_\_\_
- Name and location of clinic / hospital where diagnosis was made:

- Address of residence when diagnosed:  
\_\_\_\_\_

Excerpt from questionnaire

- Address of workplace or school when diagnosed:  
\_\_\_\_\_

- Number of times: \_\_\_\_\_

No.....**2** }   
 Don't know / Not sure.....**888** } (Go to Q.3005)

3004a. What were the symptoms you had when you suffered from the most recent episode of dengue fever?

(Respondent may indicate more than 1 answer)

| No. | Symptom                                         | Most recent onset date | Duration of symptoms (in days) |
|-----|-------------------------------------------------|------------------------|--------------------------------|
| A   | Fever                                           |                        |                                |
| 1   | Chills                                          |                        |                                |
| 2   | Intense headache                                |                        |                                |
| 3   | Body (muscle) aches                             |                        |                                |
| 4   | Bone ache or joint pains                        |                        |                                |
| 5   | Loss of appetite                                |                        |                                |
| 6   | Taste alterations                               |                        |                                |
| 7   | Nausea                                          |                        |                                |
| 8   | Vomiting                                        |                        |                                |
| 9   | Development of skin rashes                      |                        |                                |
| 10  | Skin sensitivity                                |                        |                                |
| 11  | Bleeding from the nose, mouth and gums          |                        |                                |
| 12  | Black stools, similar in appearance to coal tar |                        |                                |
| 13  | Diarrhoea                                       |                        |                                |
| 14  | Severe and continuous pain in the abdomen       |                        |                                |
| 15  | Restlessness                                    |                        |                                |
| 16  | General weakness                                |                        |                                |
| 17  | Drowsiness                                      |                        |                                |
| 18  | Pain behind the eye(s)                          |                        |                                |
| 19  | Red eye(s)                                      |                        |                                |
| 20  | Cough                                           |                        |                                |
| 21  | Sore throat                                     |                        |                                |
| 22  | Runny nose                                      |                        |                                |
| 23  | Others 1 (specify): _____                       |                        |                                |
| 24  | Others 2 (specify): _____                       |                        |                                |
| 25  | Others 3 (specify): _____                       |                        |                                |
| 26  | Others 4 (specify): _____                       |                        |                                |
| 888 | Don't know                                      |                        |                                |

Excerpt from questionnaire

3004b. Did you seek treatment for the most recent episode of dengue fever or suspected dengue fever?

Yes.....1  
No.....2 (Go to Q.3005)

3004c. Where did you seek treatment for your most recent episode of dengue fever?

(Respondent may indicate more than 1 answer, **circle** the responses)

Private GP.....1  
Government polyclinic.....2  
Emergency department at hospital.....3  
Don't know.....888

3004d. Have you been hospitalised for the most recent episode of dengue fever or suspected dengue fever?

Yes.....1  
If yes, specify for the most recent hospitalization for dengue:  
o Approximate admission date: \_\_\_\_\_  
o Length of stay: \_\_\_\_\_ days   
No.....2  
Don't know / Not sure.....888

3005. Have you been to any dengue endemic country (i.e. with known dengue cases) in your previous travel?

Yes.....1  
If yes, specify:  
o Approximate most recent date/period traveled: \_\_\_\_\_  
o Country of most recent travel: \_\_\_\_\_   
No.....2  
Don't know / Not sure.....888

3006. Remarks (if any)
